# Supplementary material for: Activating PER Repressor through a DBT-Directed Phosphorylation Switch
Source: PubMed Central journal article supplement (PMC2486307; doi:10.1371/journal.pbio.0060183), 2008-07-29

*per*<sup>0</sup>; P[*per*Δ*S*]x2

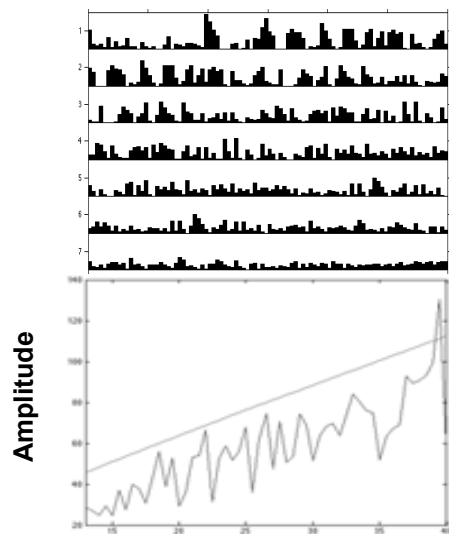

*per*<sup>0</sup>; P[*per*Δ*S*]

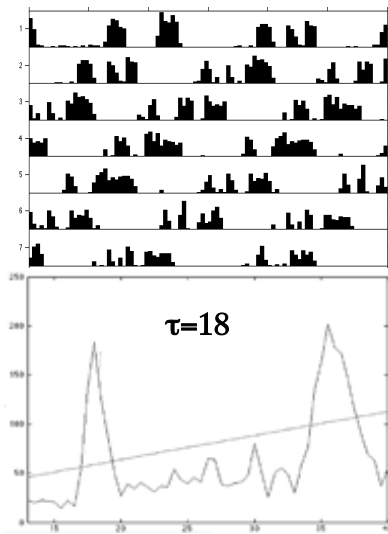

*per*<sup>0</sup>; P[*per*Δ*S*]/+

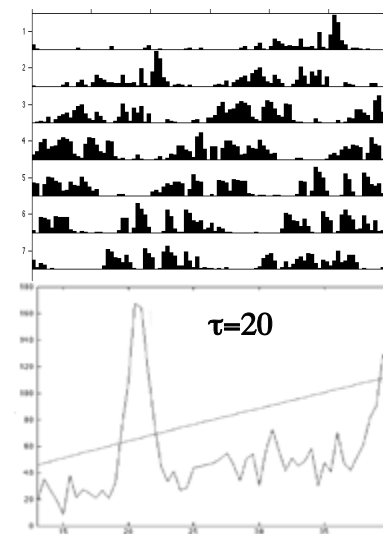

*per*<sup>+</sup>; P[*per*Δ*S*]x2

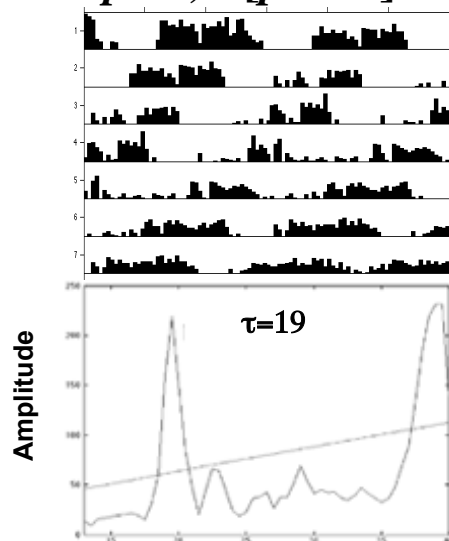

*per*<sup>+</sup>; P[*per*Δ*S*]

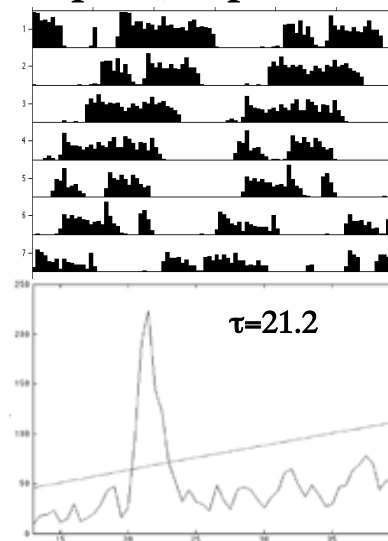

*per*<sup>+</sup>; P[*per*Δ*S*]/+

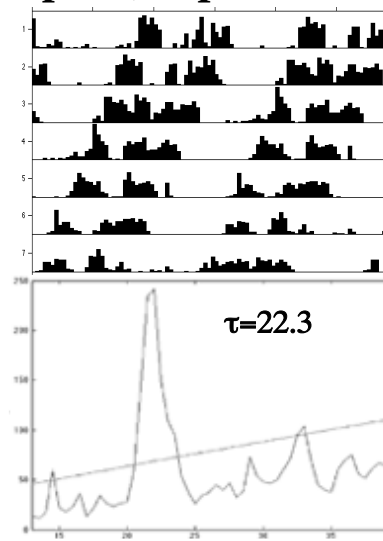

Supplement: pbio.0060183.sg001.pdf [file pbio.0060183.sg001.pdf]
