# Supplementary material for: Activating PER Repressor through a DBT-Directed Phosphorylation Switch
Source: PubMed Central journal article supplement (PMC2486307; doi:10.1371/journal.pbio.0060183), 2008-07-29

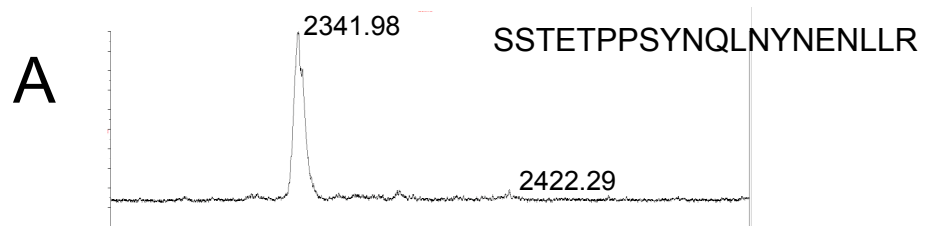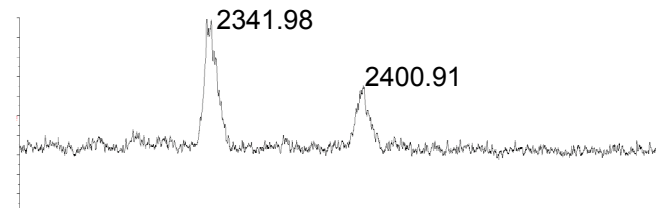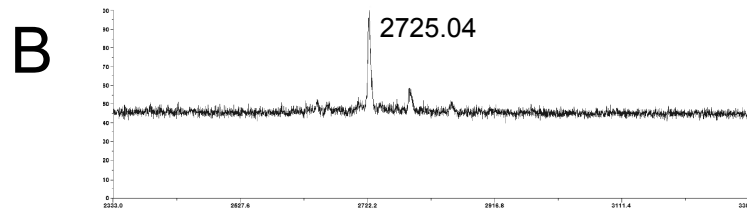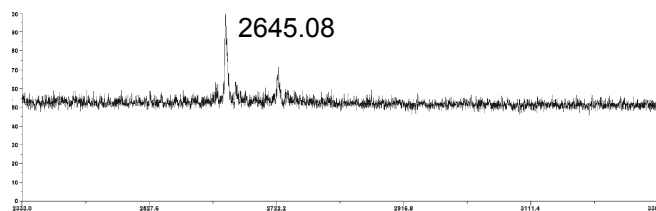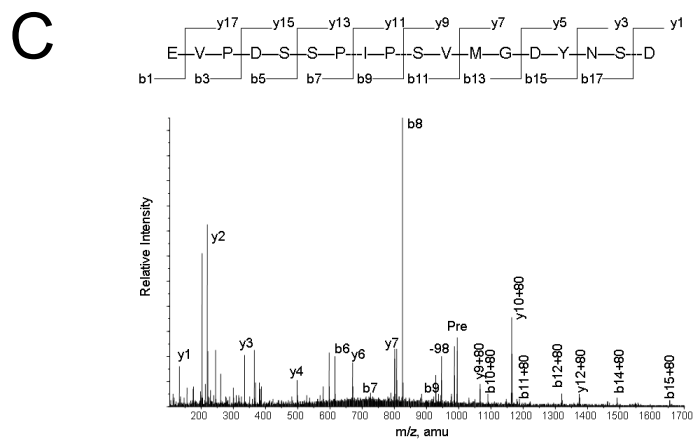

Supplement: pbio.0060183.sg003.pdf [file pbio.0060183.sg003.pdf]
